# Supplementary material
Source: Springer Nature journal article supplement (https://www.springermedizin.de/resource/supplementary/12936_2009_1177_MOESM2_ESM.pdf/9550056)

# Mean RDT +ve Malaria Cases per Calendar Week in Macha Study Area

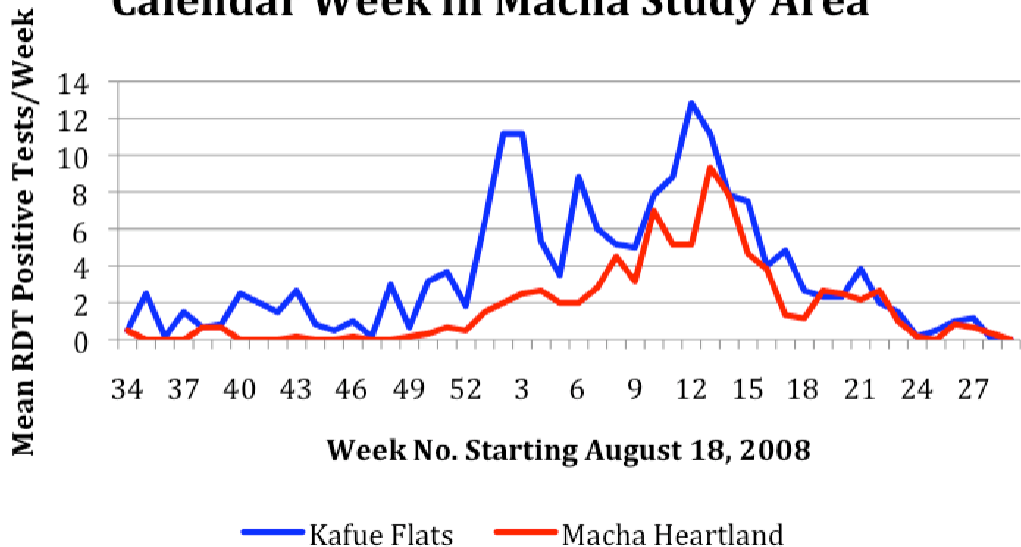

Supplement: MOESM2 [file 9550056]
